# Supplementary material for: Achieving an unprecedented hydrogen evolution rate by solvent-exfoliated CPP-based photocatalysts
Source: Royal Society of Chemistry journal article supplement (doi:10.1039/c9ta13514f), 2020-01-01
Supplement: c9ta13514f1.pdf [file c9ta13514f1.pdf]

Electronic Supplementary Information (ESI) for *Energy & Environmental Science*

This journal is © The Royal Society of Chemistry 2018

---

## **Achieving an unprecedented hydrogen evolution rate by solvent-exfoliated CPP-based photocatalysis**

**Jing-Zhao Cheng,<sup>a</sup> Li-Lin Liu,<sup>a</sup> Guangfu Liao,<sup>b</sup> Zhao-Qi Shen,<sup>a</sup> Zhi-Rong Tan,<sup>a</sup> Yu-Qin Xing,<sup>a</sup> Kai Yang,<sup>a</sup> Long Chen<sup>a</sup> and Shi-Yong Liu<sup>\*a</sup>**

<sup>a</sup>School of Chemistry and Chemical Engineering, Jiangxi University of Science and Technology, Ganzhou 341000, China

<sup>b</sup>School of Materials Science and Engineering, PCFM Lab, GD HPPC Lab, Sun Yat-sen University, Guangzhou 510275, China.

**Corresponding author:**

\* E-mail: [chelsy@zju.edu.cn](mailto:chelsy@zju.edu.cn), [chelsy@jxust.edu.cn](mailto:chelsy@jxust.edu.cn) (S. -Y. Liu)

## Contents

|                                                     |     |
|-----------------------------------------------------|-----|
| <a href="#"><u>Instruments and Measurements</u></a> | S3  |
| <a href="#"><u>Fig. S1</u></a>                      | S5  |
| <a href="#"><u>Fig. S2</u></a>                      | S6  |
| <a href="#"><u>Fig. S3</u></a>                      | S6  |
| <a href="#"><u>Fig. S4</u></a>                      | S7  |
| <a href="#"><u>Fig. S5</u></a>                      | S7  |
| <a href="#"><u>Fig. S6</u></a>                      | S8  |
| <a href="#"><u>Fig. S7</u></a>                      | S8  |
| <a href="#"><u>Fig. S8</u></a>                      | S9  |
| <a href="#"><u>Fig. S9</u></a>                      | S9  |
| <a href="#"><u>Table S1</u></a>                     | S10 |
| <a href="#"><u>Table S2</u></a>                     | S11 |
| <a href="#"><u>Fig. S10</u></a>                     | S12 |
| <a href="#"><u>Fig. S11, Fig. S12</u></a>           | S13 |
| <a href="#"><u>Table S3</u></a>                     | S14 |
| <a href="#"><u>Fig. S13, Table S4</u></a>           | S15 |
| <a href="#"><u>Table S5</u></a>                     | S16 |
| <a href="#"><u>Fig. S14, Fig. S15</u></a>           | S17 |
| <a href="#"><u>Fig. S16, Fig. S17</u></a>           | S18 |
| <a href="#"><u>Fig. S18</u></a>                     | S19 |
| <a href="#"><u>Fig. S19</u></a>                     | S20 |
| <a href="#"><u>Fig. S20, Table S6</u></a>           | S21 |
| <a href="#"><u>Fig. S21, Fig. S22</u></a>           | S22 |
| <a href="#"><u>Fig. S23, Fig. S24</u></a>           | S23 |
| <a href="#"><u>Fig. S25, Fig. S26</u></a>           | S24 |
| <a href="#"><u>Fig. S27, Fig. S28</u></a>           | S25 |
| <a href="#"><u>Fig. S29</u></a>                     | S26 |

## Instruments and measurements

Solid state magic angle spinning  $^{13}\text{C}$  CP/MAS NMR measurement was carried out on a Bruker Avance 400 model 400 MHz NMR spectrometer at a MAS rate of 10 kHz. FT-IR spectrum was measured on a FT-IR spectrometer (Bruker, ALPHA) in transmission mode at room temperature. Thermal properties of the polymer networks were evaluated using thermogravimetric analysis (TGA) with a differential thermal analysis instrument (STA2500, NETZSCH) over the temperature range from 30 to 800 °C under a nitrogen atmosphere with a heating rate of 10 °C min<sup>-1</sup>. Elemental analysis was measured by a Vario MICRO.

Pd and Sn contents were determined by inductively coupled plasma optical emission spectrometry (ICP-OES, IRIS Intrepid II), where the sample was digested in HNO<sub>3</sub>/HCl (1/1, v/v) at 265 °C, then raised the temperature to 300 °C, added HClO<sub>4</sub>, then added HNO<sub>3</sub> to extract after steaming, and diluted it by ultrapure water and filtered.

X-ray photoelectron spectroscopy (XPS) measured by Thermo ESCALAB 250XI instrument. Morphology of CPPs was obtained by a field emission scanning electron microscope (SEM, MLA650F, American) and transmission electron microscopy (TEM, Tecnai G2-20, American). Thickness of the solvent-exfoliated CPPs was characterized by a Bruker Multimode 8 atomic force microscope (AFM) under Scan Asyst mode (Bruker, USA). Specific surface areas were determined by a Tristar II 3020 (Micromeritics, Norcross, Georgia) with nitrogen as analytical gas. Samples were degassed under vacuum at ambient temperature for 24 h. The volume of nitrogen adsorption was recorded over a relative pressure range between 0.01 and 0.99. 8 points in the relative pressure range of 0.05–0.2 were used for the calculation of the surface area according to the Brunauer-Emmet-Teller (BET) theory. Contact angle were obtained by JCY type measurement instrument. (Shanghai Fang Rui Instrument Co. Ltd.)

UV-vis diffuse reflectance spectra were carried out on UV-2600 scanning UV-vis spectrophotometer. Time-resolved fluorescence spectroscopy and photoluminescence (PL) spectra were obtained on HORIBA Instruments FL-1000 fluorescence spectrometer. The photocurrents were measured by an electrochemical workstation (CHI650E/700E, Shanghai) equipped with a conventional three-electrode cell. Cyclic voltammetry (CV) measurement was carried out on a CHI660E (Chenhua, Shanghai) electrochemical workstation in a three electrode-cell system: Ag/Ag<sup>+</sup> work as the reference electrodes, glassy carbon electrodes as the working electrode, t platinum wire work as the counter

electrode. The tetrabutylammonium hexafluorophosphate ( $\text{Bu}_4\text{NPF}_6$ , 1.5 g) dissolved in 5 mL acetonitrile was used as the electrolyte solution. The electrochemical workstation was taken with a scan rate of  $100 \text{ mV s}^{-1}$  in the range of  $-2.5 \text{ V}$  to  $2.5 \text{ V}$  and two times. Before the electrochemical test, CPP (2 mg) was dispersed in ethanol and then pipet 5  $\mu\text{L}$  of the mixed solution onto the working electrode. After the ethanol was air-dried, 5  $\mu\text{L}$  of chitosan was added to deposit the sample on the electrode. Theoretical calculations based on DFT methods have been performed for the oligomers with Gaussian09 program. Becke's three-parameter gradient-corrected functional (B3LYP) with 6-31G(d,p) basis for geometric optimization.

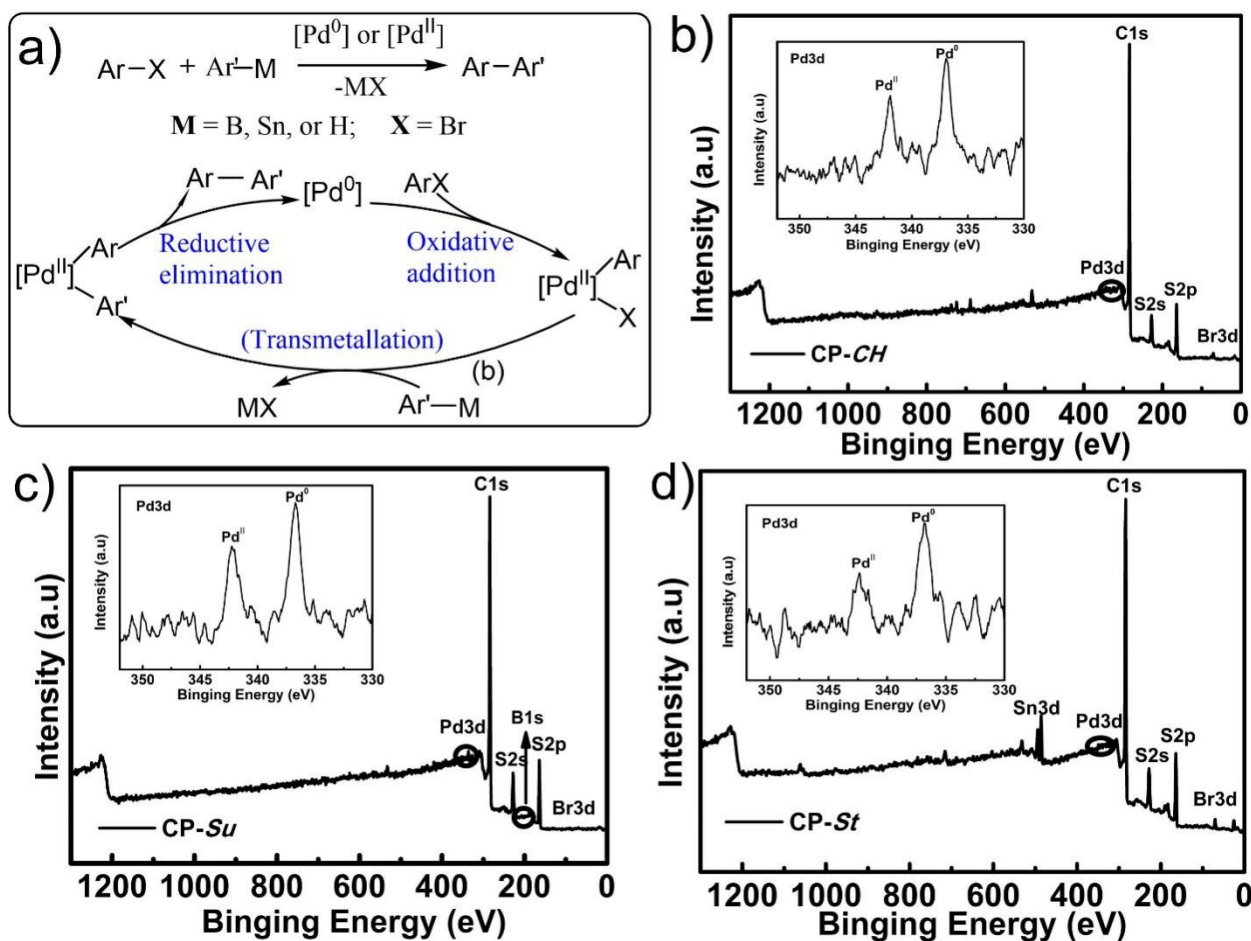

**Fig. S1** Catalytic cycle of Pd-catalyzed C-M/C-Br (M=B, H and Sn) couplings that involves Pd<sup>0</sup> ↔ Pd<sup>II</sup> interchange (a), XPS spectra of **CP-CH** (b), **CP-Su** (c) and **CP-St** (d), and inserts are Pd3d.

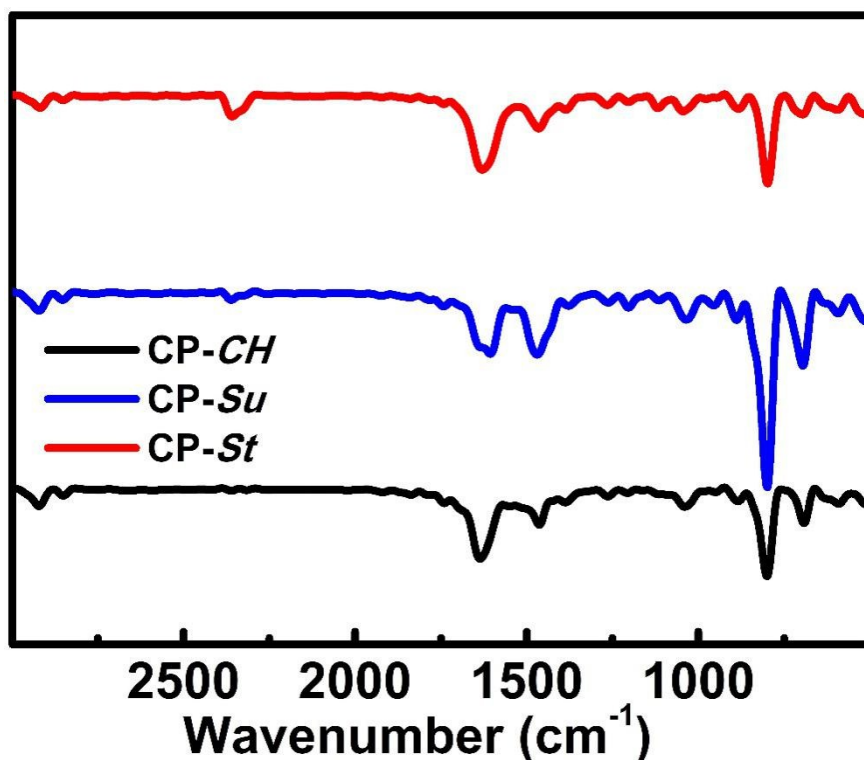

**Fig. S2** FT-IR spectra of as-prepared CP-CH , CP-Su and CP-St

[The peaks at 1626 cm<sup>-1</sup> and 1466 cm<sup>-1</sup> were the skeleton vibration of the aromatic ring for all polymers.  
The signal at 808 cm<sup>-1</sup> was the C–S stretching vibration from thiophene units.]

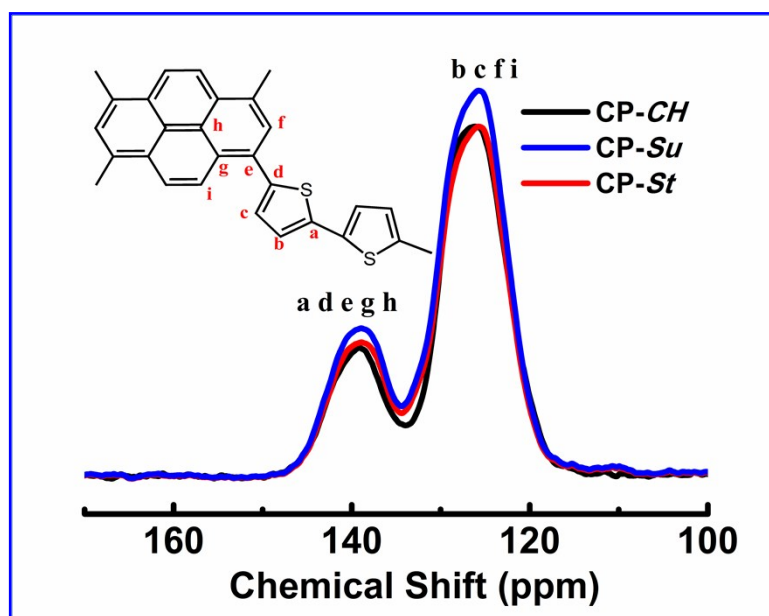

**Fig. S3** Solid-state <sup>13</sup>C NMR spectrum of CP-CH , CP-Su and CP-St.

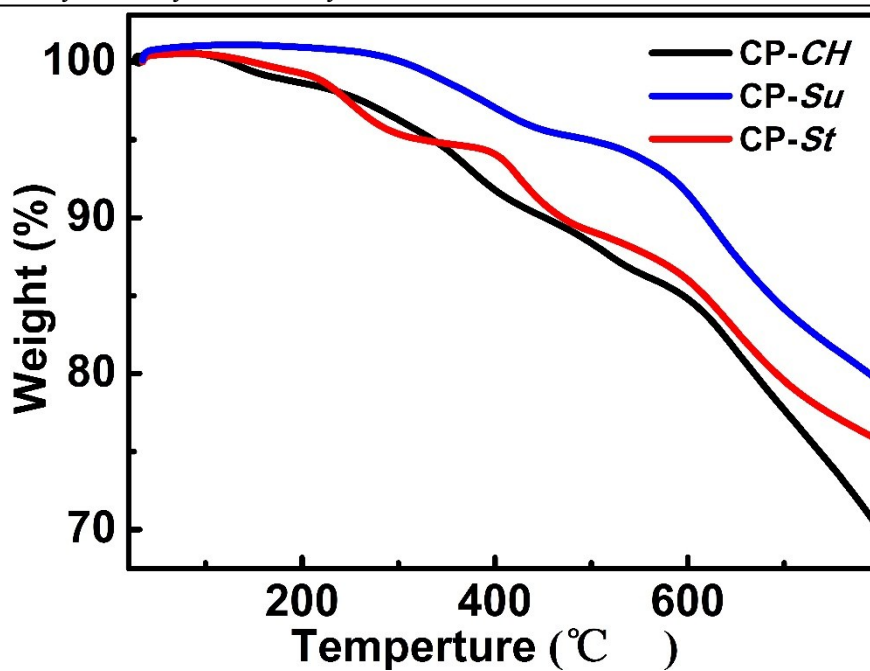

Fig. S4 TGA curves of as-prepared CP-CH, CP-Su and CP-St.

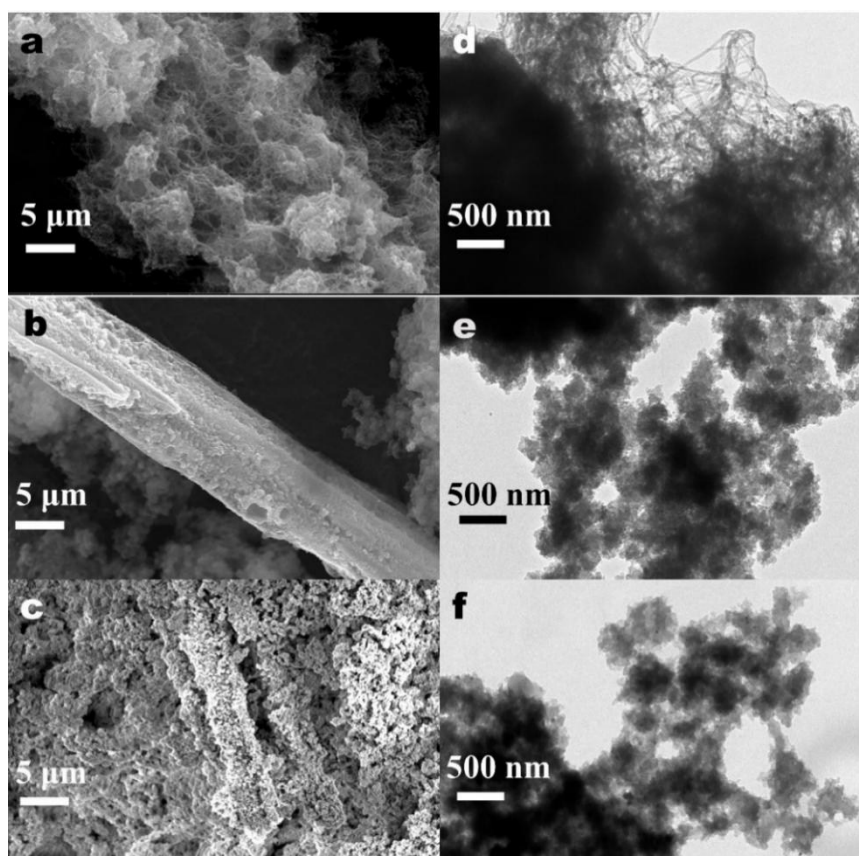

Fig. S5 SEM and TEM images of CP-CH (a, d), CP-Su (b, e) and CP-St (c, f).

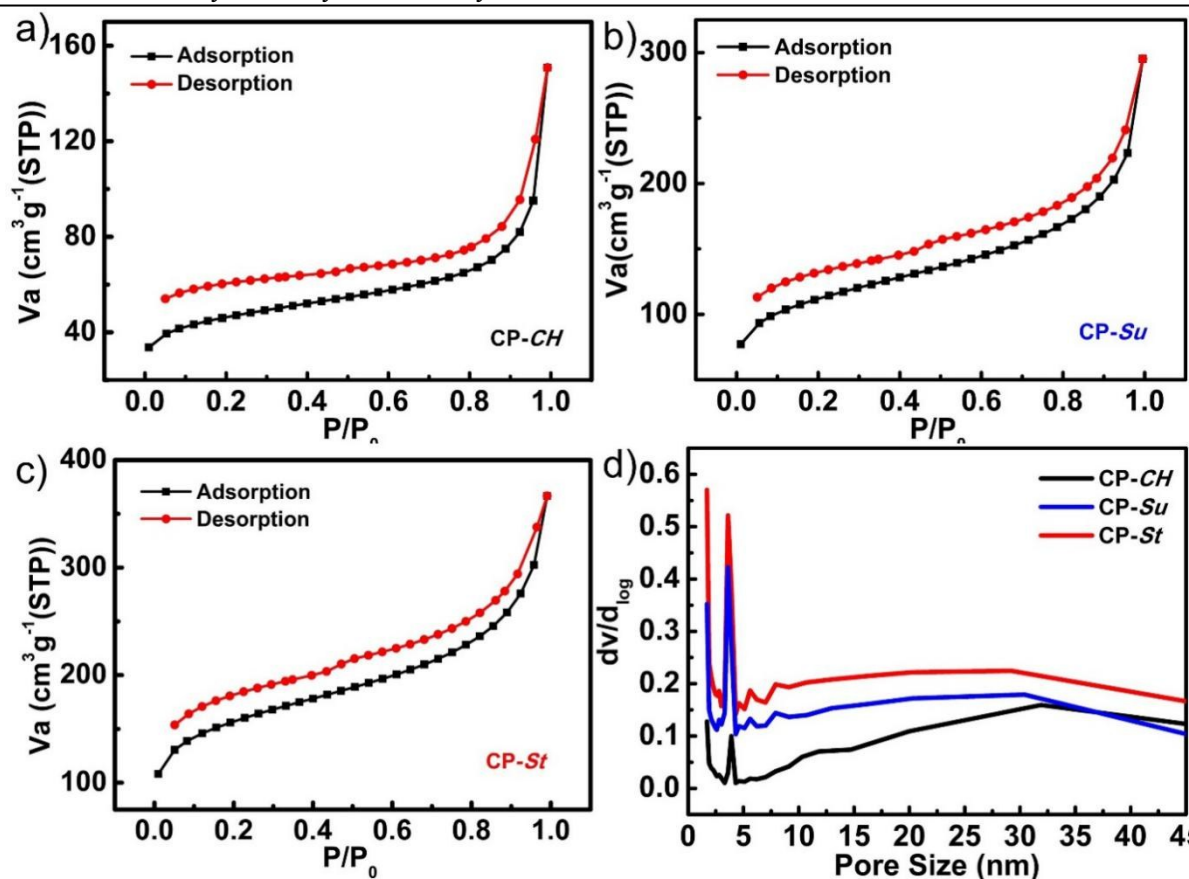

**Fig. S6** N<sub>2</sub> adsorption-desorption isotherms of CP-CH, CP-Su and CP-St (a~c) and their pore size distribution (d).

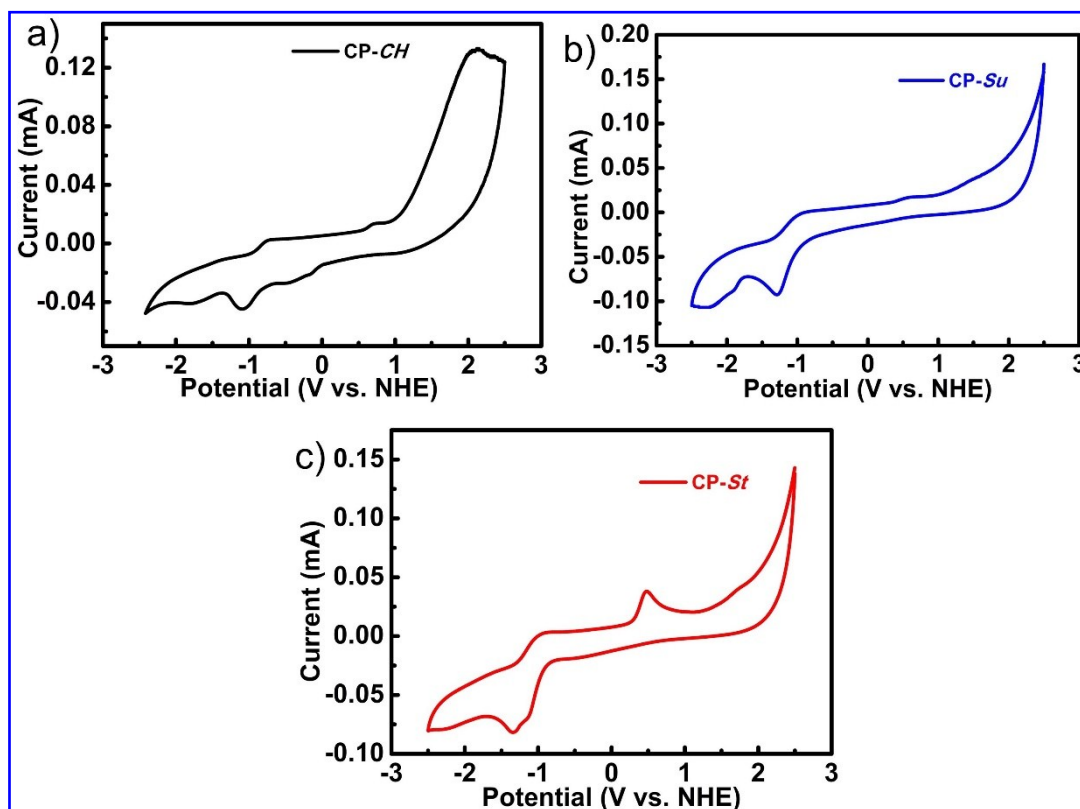

**Fig. S7** CV curves of CP-CH, CP-Su and CP-St.

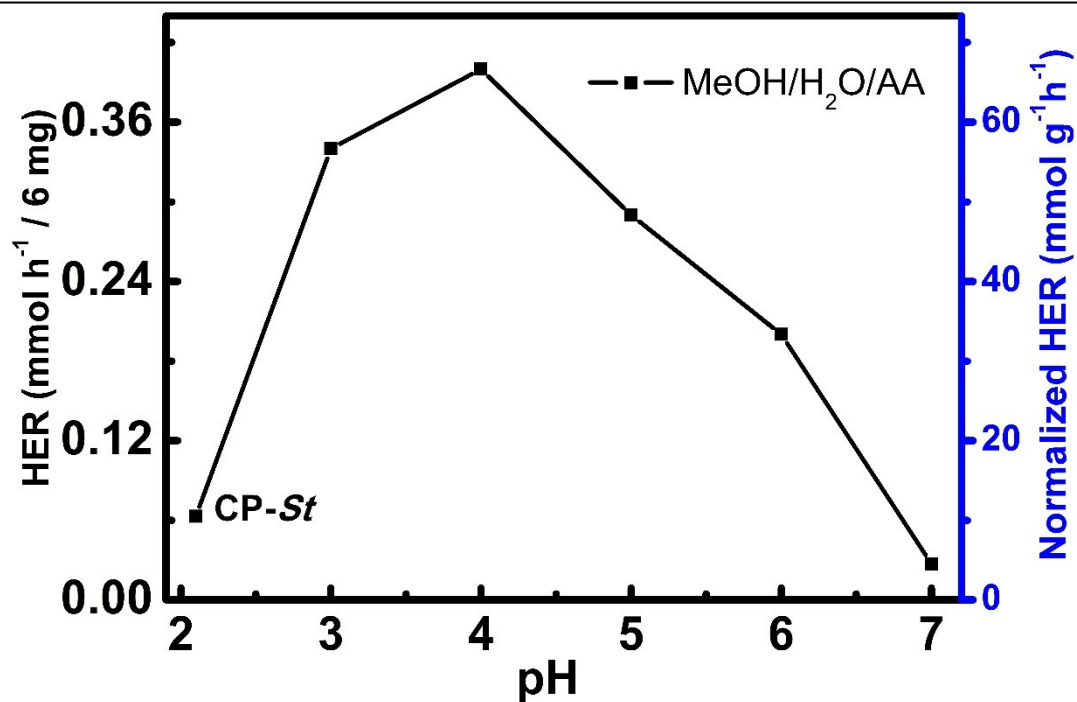

Fig. S8 Influences of pH on the PHP activity of CP-St/MeOH/H<sub>2</sub>O/AA mixture ( $\lambda > 420$ )

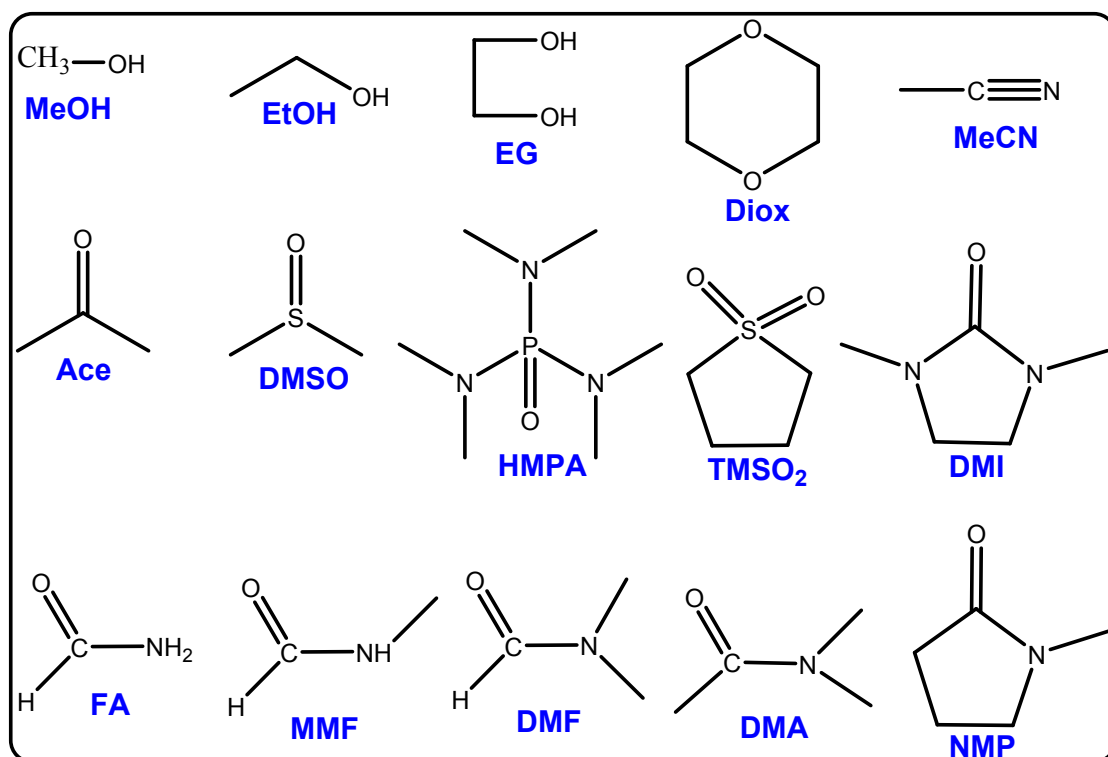

Fig. S9 Molecular structures of 15 co-solvents investigated in this work.

**Table S1** PHP activity of **CP-St** (6 mg) in varied reaction media (pH=4) using AA as SED.

| Entry     | Mixed solvent                       | H <sub>2</sub> amount (mL) | HER<br>(mmol h <sup>-1</sup> / 6mg) | TO<br>N | HER<br>(mmol h <sup>-1</sup> g <sup>-1</sup> ) |
|-----------|-------------------------------------|----------------------------|-------------------------------------|---------|------------------------------------------------|
| <b>1</b>  | H <sub>2</sub> O                    | 6.7                        | 0.06                                | 26      | 10.0                                           |
| <b>2</b>  | EG/H <sub>2</sub> O                 | 9.6                        | 0.09                                | 38      | 14.3                                           |
| <b>3</b>  | EtOH/H <sub>2</sub> O               | 13.7                       | 0.12                                | 55      | 20.3                                           |
| <b>4</b>  | Diox/H <sub>2</sub> O               | 40.3                       | 0.36                                | 158     | 60.0                                           |
| <b>5</b>  | Ace/H <sub>2</sub> O                | 43.7                       | 0.39                                | 171     | 65.0                                           |
| <b>6</b>  | MeOH/H <sub>2</sub> O               | 44.6                       | 0.40                                | 175     | 66.3                                           |
| <b>7</b>  | HMPA/H <sub>2</sub> O               | 58.9                       | 0.53                                | 231     | 87.7                                           |
| <b>8</b>  | FA/H <sub>2</sub> O                 | 63.4                       | 0.57                                | 248     | 94.3                                           |
| <b>9</b>  | TMSO <sub>2</sub> /H <sub>2</sub> O | 67.2                       | 0.60                                | 263     | 100.0                                          |
| <b>10</b> | MeCN/H <sub>2</sub> O               | 67.9                       | 0.61                                | 266     | 101.0                                          |
| <b>11</b> | DMSO/H <sub>2</sub> O               | 70.6                       | 0.63                                | 276     | 105.0                                          |
| <b>12</b> | MMF/H <sub>2</sub> O                | 88.3                       | 0.79                                | 345     | 131.3                                          |
| <b>13</b> | DMI/H <sub>2</sub> O                | 112.4                      | 1.00                                | 440     | <b>167.3</b>                                   |
| <b>14</b> | DMF/H <sub>2</sub> O                | 119.6                      | 1.07                                | 468     | <b>178.0</b>                                   |
| <b>15</b> | DMAc/H <sub>2</sub> O               | 120.1                      | 1.07                                | 470     | <b>178.7</b>                                   |
| <b>16</b> | NMP/H <sub>2</sub> O                | 128.1                      | <b>1.14</b>                         | 502     | <b>190.7</b>                                   |

| Refs.            | SED          | With Pt<br>or not? | Light source |           | HER [ $\mu\text{mol h}^{-1}$<br>/ amount of<br>catal. (mg)] | Normalized<br>HER ( $\mu\text{mol h}^{-1}$<br>g $^{-1}$ ) | Catalyst                  | AQY (%)     |
|------------------|--------------|--------------------|--------------|-----------|-------------------------------------------------------------|-----------------------------------------------------------|---------------------------|-------------|
|                  |              |                    | Filter (nm)  | Power(W)  |                                                             |                                                           |                           |             |
| 1.               | TEOA         | ---                | >420         | 300 (Xe)  | 947/50                                                      | 18,940                                                    | CN-NS                     | 26.1        |
| 2.               | TEOA         | 3%                 | >420         | 300 (Xe)  | 770/50                                                      | 15,400                                                    | g-CN                      | 50.7        |
| 3                | AA           | ---                | >420         | 17(LED)   | --                                                          | 50,000                                                    | PFODTBT                   | 0.6         |
| 4                | TEOA         | 3%                 | >420         | 300 (Xe)  | 442/10                                                      | 44,200                                                    | PDBTSO                    | --          |
| 5                | TEA          | 3%                 | >420         | 300 (Xe)  | 1874/50                                                     | 37,480                                                    | DACN-100                  | 34.4        |
| 6                | MeOH&<br>TEA | 3%                 | >420         | 300 (Xe)  | 19.7/0.325                                                  | 84,000                                                    | P10-e                     | 20.4        |
| 7                | TEOA         | 3%                 | >300         | 300 (Xe)  | 649.3/50                                                    | 12,986                                                    | PyDOBT-1                  | 6.1         |
| 8                | AA           | 0.1% Pt            | >420         | 17(LED)   | 16.25                                                       | 50,000                                                    | PS-PEG-COOH               | 0.5         |
| 9                | lactic acid  | ---                | >420         | 300 (Xe)  | 6415                                                        | 128,300                                                   | Pt/TiO <sub>2</sub> /CdS  | --          |
| 10               | glycerol     | 3.8%               | >420         | 230 (LED) | --                                                          | 70,800                                                    | TiO <sub>2</sub> /rGO(3%) | --          |
| 11               | TEOA         | 3%                 | >420         | 300 (Xe)  | 460/50                                                      | 9200                                                      | DBTD-CMP1                 | 3.3         |
| 12               | TEA          | ---                | >420         | 300 (Xe)  | 81.5/25                                                     | 3260                                                      | P10                       | 11.6        |
| 13               | AA           | With Pt            | >420         | 300 (Xe)  | 815/5                                                       | 16,300                                                    | FS-COF                    | 3.2         |
| <b>This work</b> | AA           | ---                | >420         | 300 (Xe)  | 1140/6                                                      | 190,700                                                   | <b>CP-Sr</b>              | <b>6.9</b>  |
| <b>This work</b> | AA           | ---                | >420         | 300 (Xe)  | 1720/12                                                     | 143,000                                                   | <b>CP-Sr</b>              | <b>9.6</b>  |
| <b>This work</b> | AA           | ---                | >420         | 300 (Xe)  | 1900/18                                                     | 105,400                                                   | <b>CP-Sr</b>              | <b>11.4</b> |
| <b>This work</b> | AA           | 0.5%               | >420         | 300 (Xe)  | 1820/6                                                      | 307,200                                                   | <b>CP-Sr</b>              | <b>--</b>   |

1. G. Liu, T. Wang, H. Zhang, X. Meng, D. Hao, K. Chang, P. Li, T. Kako and J. Ye, *Angew. Chem. Int. Ed.*, 2015, **54**, 13561.
2. L. Lin, H. Ou, Y. Zhang and X. Wang, *ACS Catal.*, 2016, **6**, 3921.
3. P. B. Pati, G. Damas, L. Tian, D. L. A. Fernandes, L. Zhang, I. B. Pehlivan, T. Edvinsson, C. M. Araujo and H. Tian, *Energy Environ. Sci.*, 2017, **10**, 1372.
4. G. Shu, Y. Li, Z. Wang, J. X. Jiang and F. Wang, *Appl. Catal. B Environ.*, 2020, **261**, 118230.
5. Q. Han, Z. Cheng, B. Wang, H. Zhang and L. Qu, *ACS Nano*, 2018, **12**, 5221.
6. C. M. Aitchison, R. S. Sprick and A. I. Cooper, *J. Mater. Chem. A*, 2019, **7**, 2490.
7. Y. Zhao, W. Ma, Y. Xu, C. Zhang, Q. Wang, T. Yang, X. Gao, F. Wang, C. Yan and J. X. Jiang, *Macromolecules*, 2018, **51**, 9502.
8. L. Wang, R. F.-Terán, L. Zhang, D. L. A. Fernandes, L. Tian, H. Chen and H. Tian, *Angew. Chem. Int. Ed.*, 2016, **55**, 12306.
9. J. Wang, Z. Wang, P. Qu, Q. Xu, J. Zheng, S. Jia, J. Chen and Z. Zhu, *Int. J. Hydrogen Energy*, 2018, **43**, 7388.
10. P. Ribao, M. A. Esteves, V. R. Fernande, M. J. Rivero, C.M. Rangel and I. Ortiz, *Hydrogen Energy*, 2019, **44**, 28494.
11. Z. Wang, X. Yang, T. Yang, Y. Zhao, F. Wang, Y. Chen, J. H. Zeng, C. Yan, F. Huang and J. X. Jiang, *ACS Catal.*, 2018, **8**, 8590.
12. M. Sachs, R. S. Sprick, D. Pearce, S. A. J. Hillman, A. Monti, A. A. Y. Guilbert, N. J. Brownbill, S. Dimitrov, X. Shi, F. Blanc, M. A. Zwijnenburg, J. Nelson, J. R. Durrant and A. I. Cooper, *Nat. Commun.*, 2018, **9**, 4968.
13. X. Wang, L. Chen, S. Y. Chong, Y. Wu, W. H. Zhu, M. A. Zwijnenburg, R. S. Sprick and A. I. Cooper, *Nat. Chem.*, 2018, **10**, 1180.

**Table S2** Summary of published HER and the normalized HERs of organic & inorganic photocatalysts.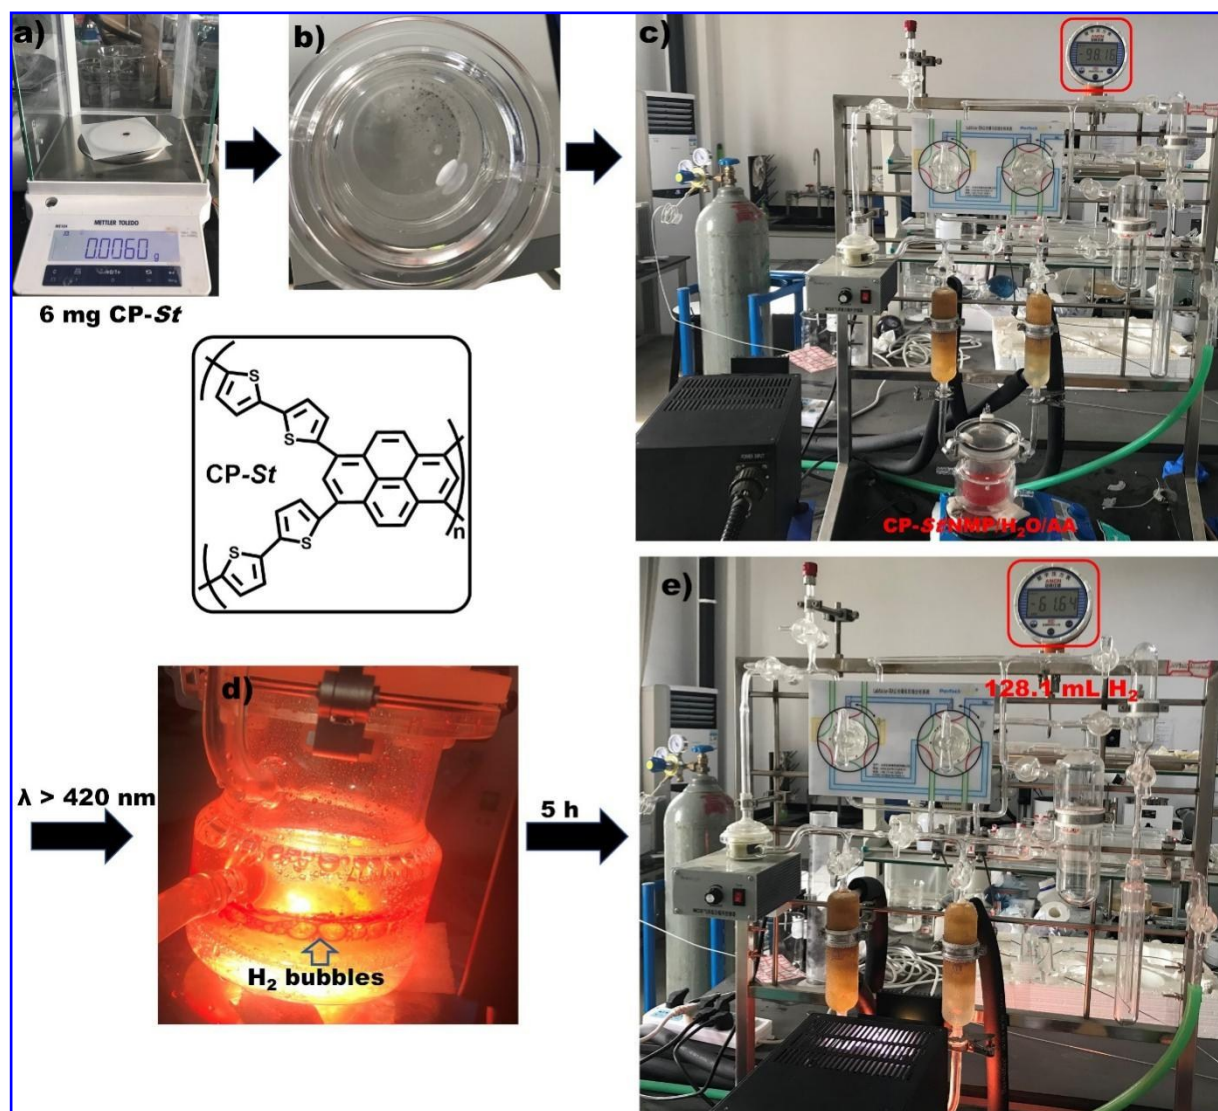

**Fig. S10** 6.0 mg CP-St (a) put in reaction vessel (b), and dispersed in NMP/H<sub>2</sub>O/AA mixed solution (36 mL, pH = 4), before (c), during (d) and after (e) irradiation under visible light for 5 h. [The amount of H<sub>2</sub> were checked by the GC equipped with a TCD detector, the reading on vacuum gauge before and after irradiation are shown in c and e]

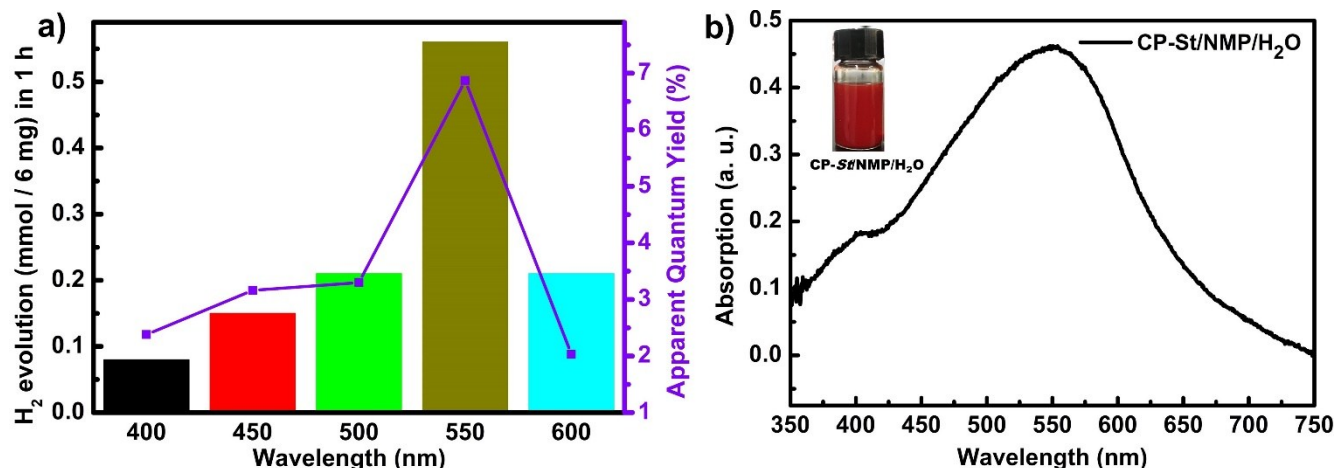

**Fig. S11** (a) The hydrogen evolutions (mmol) of **CP-St** (6 mg) dispersed in NMP/H<sub>2</sub>O/AA (pH=4) under different monochromatic light irradiation in 1 h, and their corresponding AQY values. (b) Uv-vis spectrum of dispersion of **CP-St** in NMP/H<sub>2</sub>O mixed solvent (insert is its corresponding digital photo).

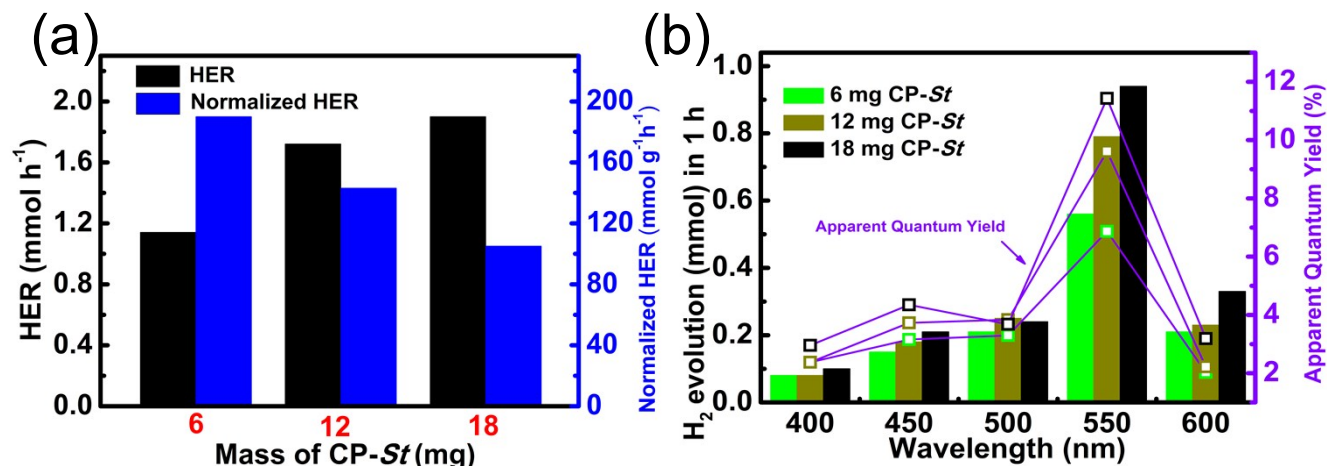

**Fig. S12** Influence of mass of **CP-St** dispersed in NMP/H<sub>2</sub>O/AA on the HERs under visible light (a), and AQYs (b).

[6, 12 and 18 mg **CP-St** were dispersed in 36 mL NMP/H<sub>2</sub>O/AA solution (6 mL NMP + 30 mL H<sub>2</sub>O + 4 g AA) with a pH adjusted to 4, and subjected to HER and AQY test, respectively. It was found that the un-normalized HERs did not linearly increase with the increase of masses of **CP-St** used. As a result, 18 mg **CP-St** has the highest un-normalized HER (mmol h<sup>-1</sup>) and highest AQY, while a lowest normalized HER (mmol h<sup>-1</sup> g<sup>-1</sup>).]

**Table S3** HERs and AQYs of varied masses of **CP-St** dispersed in NMP/H<sub>2</sub>O/AA solution<sup>a</sup>

| Mass (mg) | HER (mmol h <sup>-1</sup> ) <sup>b</sup> | Normalized HER (mmol h <sup>-1</sup> g <sup>-1</sup> ) <sup>b</sup> | Wavelength (nm) | H <sub>2</sub> evolution (mmol) in 1 h | AQY (%)      |
|-----------|------------------------------------------|---------------------------------------------------------------------|-----------------|----------------------------------------|--------------|
| 6         | 1.14                                     | 190.7                                                               | 400             | 0.08                                   | 2.38         |
|           |                                          |                                                                     | 450             | 0.15                                   | 3.16         |
|           |                                          |                                                                     | 500             | 0.21                                   | 3.3          |
|           |                                          |                                                                     | <b>550</b>      | <b>0.56</b>                            | <b>6.87</b>  |
|           |                                          |                                                                     | 600             | 0.21                                   | 2.03         |
| 12        | 1.72                                     | 143.0                                                               | 400             | 0.08                                   | 2.38         |
|           |                                          |                                                                     | 450             | 0.18                                   | 3.73         |
|           |                                          |                                                                     | 500             | 0.25                                   | 3.84         |
|           |                                          |                                                                     | <b>550</b>      | <b>0.79</b>                            | <b>9.61</b>  |
|           |                                          |                                                                     | 600             | 0.23                                   | 2.22         |
| 18        | 1.90                                     | 105.4                                                               | 400             | 0.10                                   | 2.96         |
|           |                                          |                                                                     | 450             | 0.21                                   | 4.35         |
|           |                                          |                                                                     | 500             | 0.24                                   | 3.68         |
|           |                                          |                                                                     | <b>550</b>      | <b>0.94</b>                            | <b>11.43</b> |
|           |                                          |                                                                     | 600             | 0.33                                   | 3.19         |

<sup>a</sup> All varied masses of CP-St were dispersed in 36 mL NMP/H<sub>2</sub>O/AA solution (6 mL NMP + 30 mL H<sub>2</sub>O + 4 g AA) with a pH adjusted to 4. <sup>b</sup> Under visible light irradiation ( $\lambda > 420$  nm).

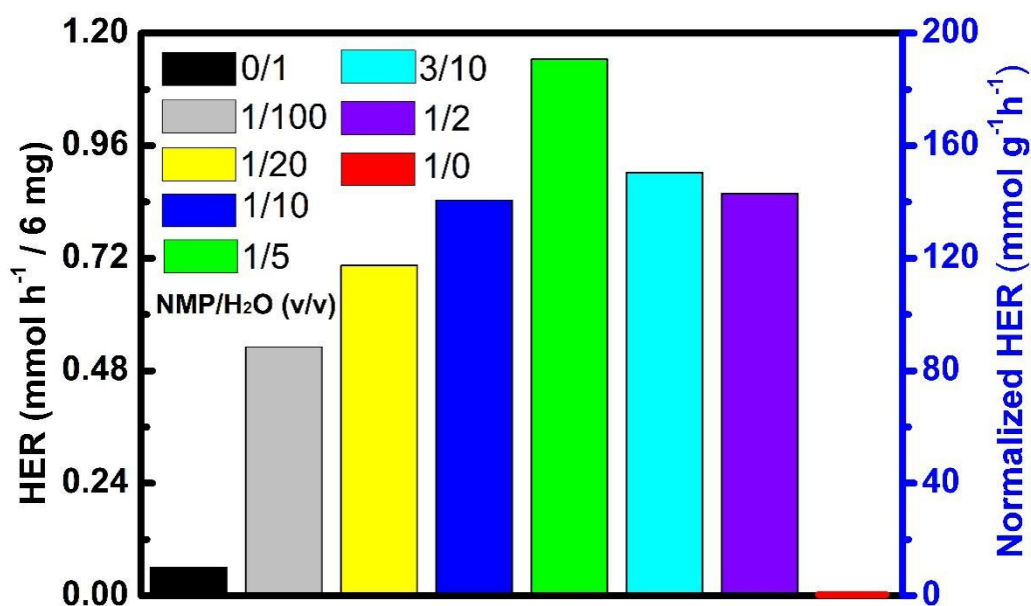

Fig. S13 Influence of amount of NMP on the HERs of **CP-St**/NMP/H<sub>2</sub>O/AA mixture.

Table S4 The influence amount of NMP on the HERs of **CP-St**/NMP/H<sub>2</sub>O/AA mixture.

| Entry            | NMP/H <sub>2</sub> O (v/v) | H <sub>2</sub> evolution (mL) | HER (mmol h <sup>-1</sup> / 6 mg) | TO N | HER (mmol h <sup>-1</sup> g <sup>-1</sup> ) |
|------------------|----------------------------|-------------------------------|-----------------------------------|------|---------------------------------------------|
| 1                | 0/1                        | 6.7                           | 0.06                              | 26   | 10.0                                        |
| 2                | 1/100                      | 59.4                          | 0.53                              | 233  | 88.4                                        |
| 3                | 1/20                       | 78.9                          | 0.70                              | 309  | 117.4                                       |
| 4                | 1/10                       | 94.5                          | 0.84                              | 370  | 140.6                                       |
| 5                | 1/5                        | 128.1                         | 1.14                              | 502  | 190.7                                       |
| 6                | 3/10                       | 101.1                         | 0.90                              | 396  | 150.4                                       |
| 7                | 1/2                        | 96.0                          | 0.86                              | 378  | 142.9                                       |
| 8 <sup>a)</sup>  | 1/0                        | 0                             | 0                                 | 0    | 0                                           |
| 9 <sup>b)</sup>  | 1/5                        | 0                             | 0                                 | 0    | 0                                           |
| 10 <sup>c)</sup> | 1/5                        | 0                             | 0                                 | 0    | 0                                           |

<sup>a)</sup> In the absence of water.

<sup>b)</sup> **CP-St**/NMP/H<sub>2</sub>O/AA mixture under darkness.

<sup>c)</sup> NMP/H<sub>2</sub>O/AA mixture under light irradiation in the absence of photocatalyst.

**Table S5** The correlation between PHP activity and structure & properties of varied cosolvents using **CP-St** and AA as catalyst and SED, respectively. <sup>a)</sup>

| Reaction media                      | Hydrogen bonding donor | Hydrogen bonding acceptor | HER (mmol h <sup>-1</sup> g <sup>-1</sup> ) |
|-------------------------------------|------------------------|---------------------------|---------------------------------------------|
| EG/H <sub>2</sub> O                 | strong                 | middle                    | 14.3                                        |
| EtOH/H <sub>2</sub> O               | strong                 | middle                    | 20.3                                        |
| Diox/H <sub>2</sub> O               | no                     | middle                    | 60.0                                        |
| Ace/H <sub>2</sub> O                | weak                   | strong                    | 65.0                                        |
| MeOH/H <sub>2</sub> O               | strong                 | middle                    | 66.3                                        |
| HMPA/H <sub>2</sub> O               | no                     | strong                    | 87.7                                        |
| FA/H <sub>2</sub> O                 | middle                 | strong                    | 94.3                                        |
| TMSO <sub>2</sub> /H <sub>2</sub> O | no                     | strong                    | 100.0                                       |
| MeCN/H <sub>2</sub> O               | weak                   | strong                    | 101.0                                       |
| DMSO/H <sub>2</sub> O               | no                     | strong                    | 105.0                                       |
| MMF/H <sub>2</sub> O                | weak                   | strong                    | 131.3                                       |
| DMI/H <sub>2</sub> O                | no                     | strong                    | <b>167.3</b>                                |
| DMF/H <sub>2</sub> O                | no                     | strong                    | <b>178.0</b>                                |
| DMAc/H <sub>2</sub> O               | no                     | strong                    | <b>178.7</b>                                |
| NMP/H <sub>2</sub> O                | no                     | strong                    | <b>190.7</b>                                |

<sup>a)</sup> HERs increase from up to down.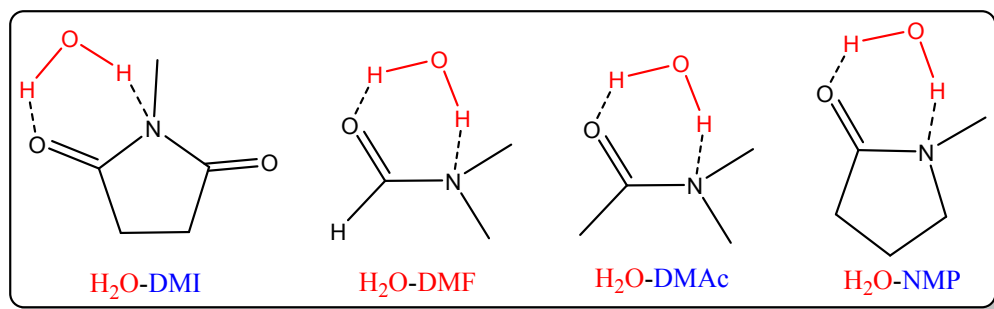**Scheme S1** Non-covalent interaction between water-soluble aprotic bipolar solvents (reaction media) and the protons of H<sub>2</sub>O.

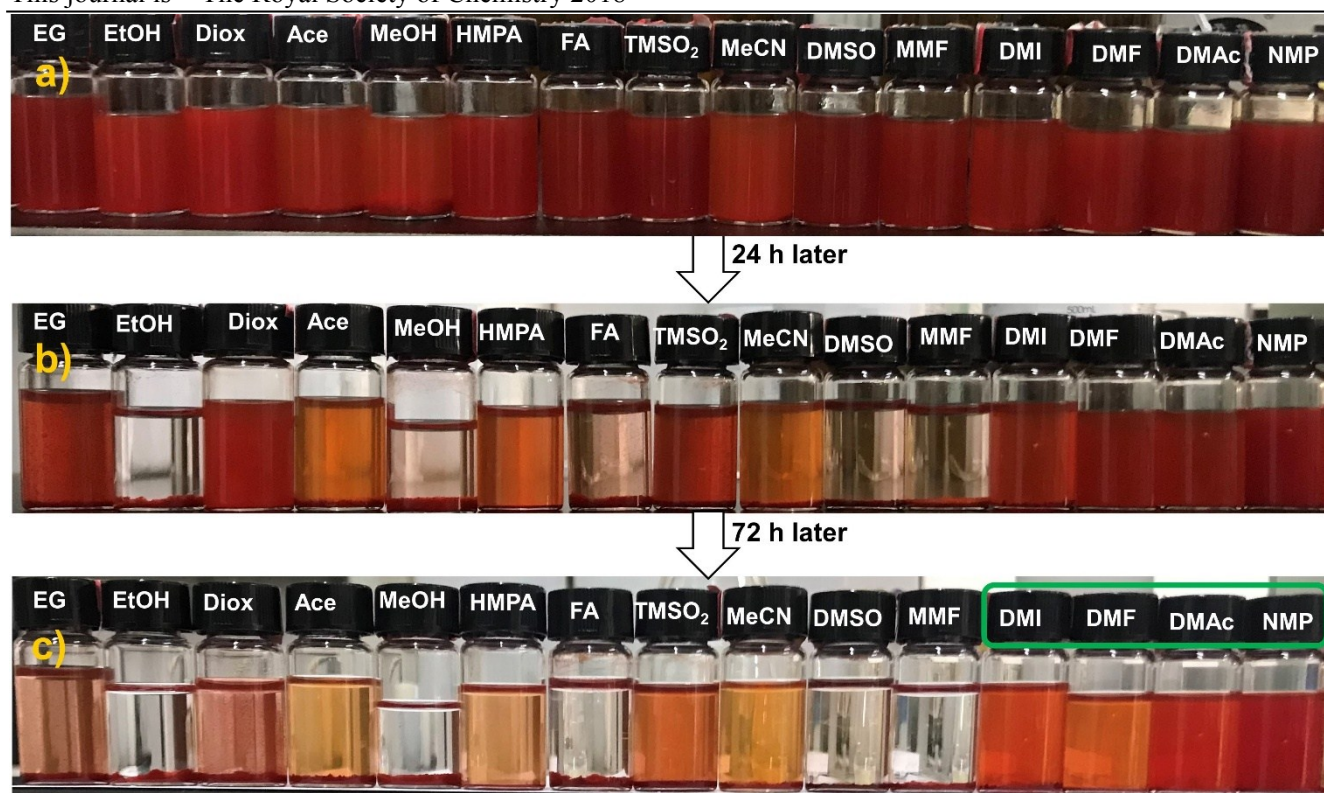

**Fig. S14** CP-*St* ultrasonically dispersed (for 10 minutes) in varied solvents, and standing for 0 h (a), 24 h (b) and 72 h (c), respectively.

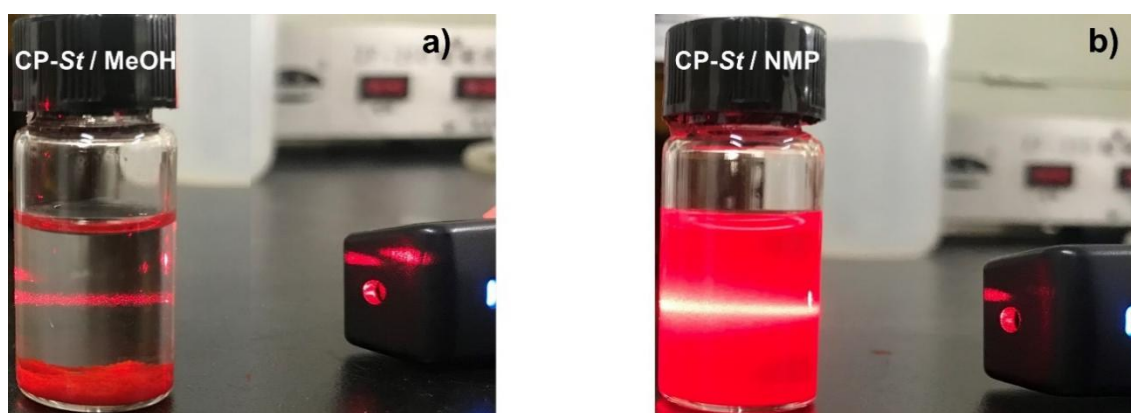

**Fig. S15** Light beams pass through the stored dispersions of CP-*St* in MeOH (a) and NMP (b).  
[(b) shows the Tyndall effect of CP-*St* dispersed in NMP after being store for one month.]

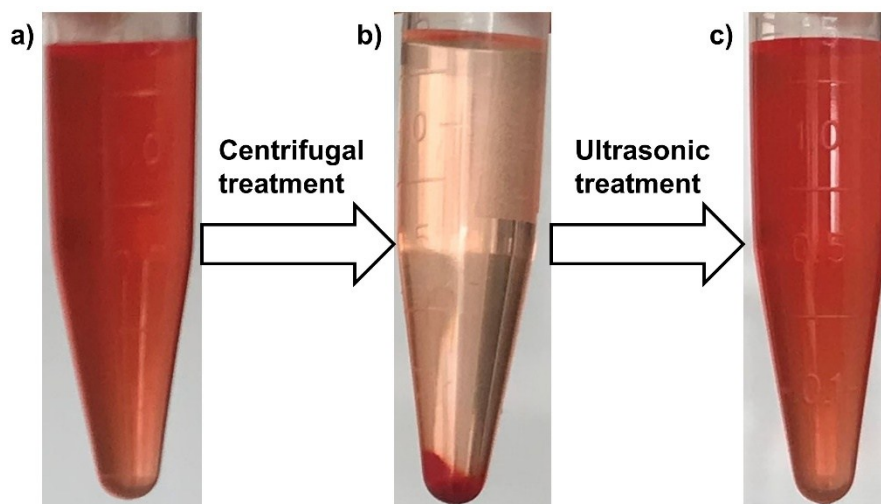

**Fig. S16** Dispersion of **CP-St** in NMP after being stored for one month (a), then treated by centrifugation at a speed of 10,000 r. p. m. (b), and re-dispersed by a conventional ultrasonic treatment (c).

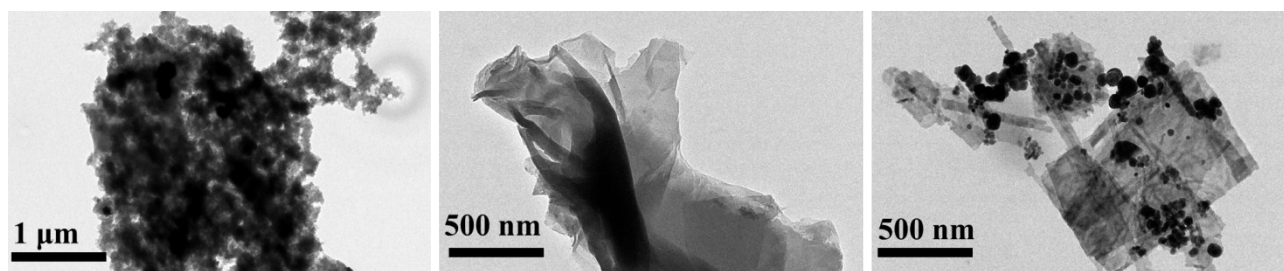

**Fig. S17** TEM images of bulk **CP-St** (a), and **CP-St** exfoliated by NMP (b) (c) and (d).  
[The TEM samples of bulk and exfoliated ones were obtained by dropping EtOH and NMP dispersions, respectively, onto carbon grids]

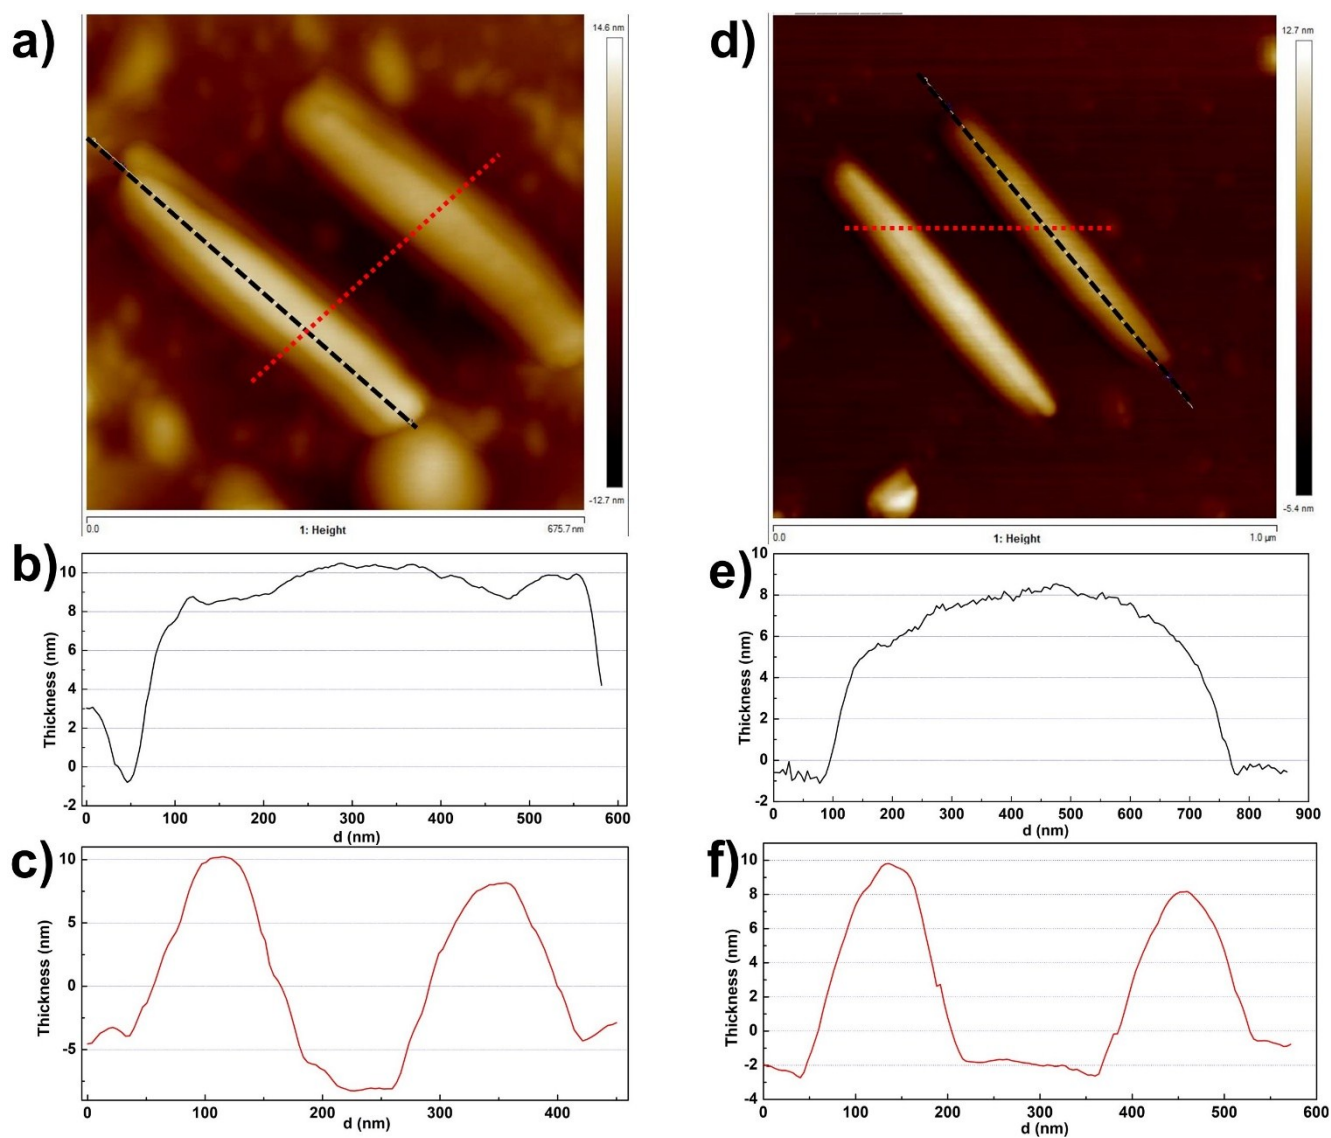

**Fig. S18** AFM images of **CP-St** nanosheets exfoliated by DMF (a) and NMP (d) and corresponding thickness analysis ( (b), (c), and (e) and (f).

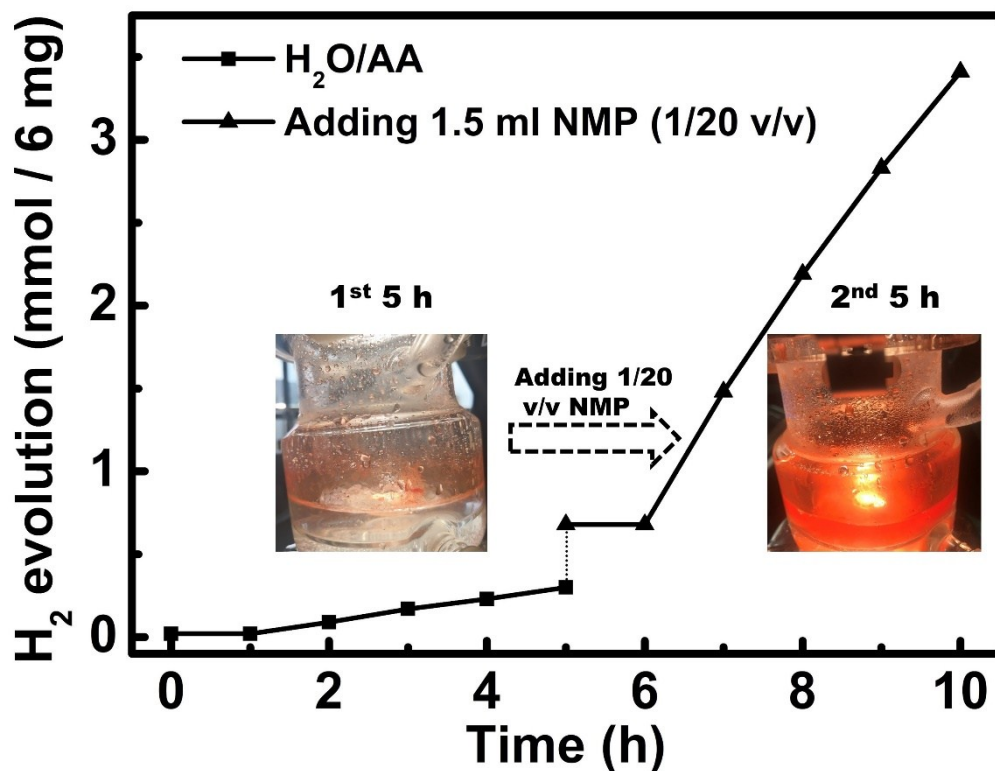

**Fig. S19** The influence of introduction of NMP into CP-*St*/H<sub>2</sub>O/AA mixture on PHP activity.

[CP-*St* dispersed in H<sub>2</sub>O/AA was subjected to visible-light irradiation for the first 5 h, then stopped it, added a small amount of NMP (1/20 v/v) into the reaction mixture, and restarted it for the next 5 h.]

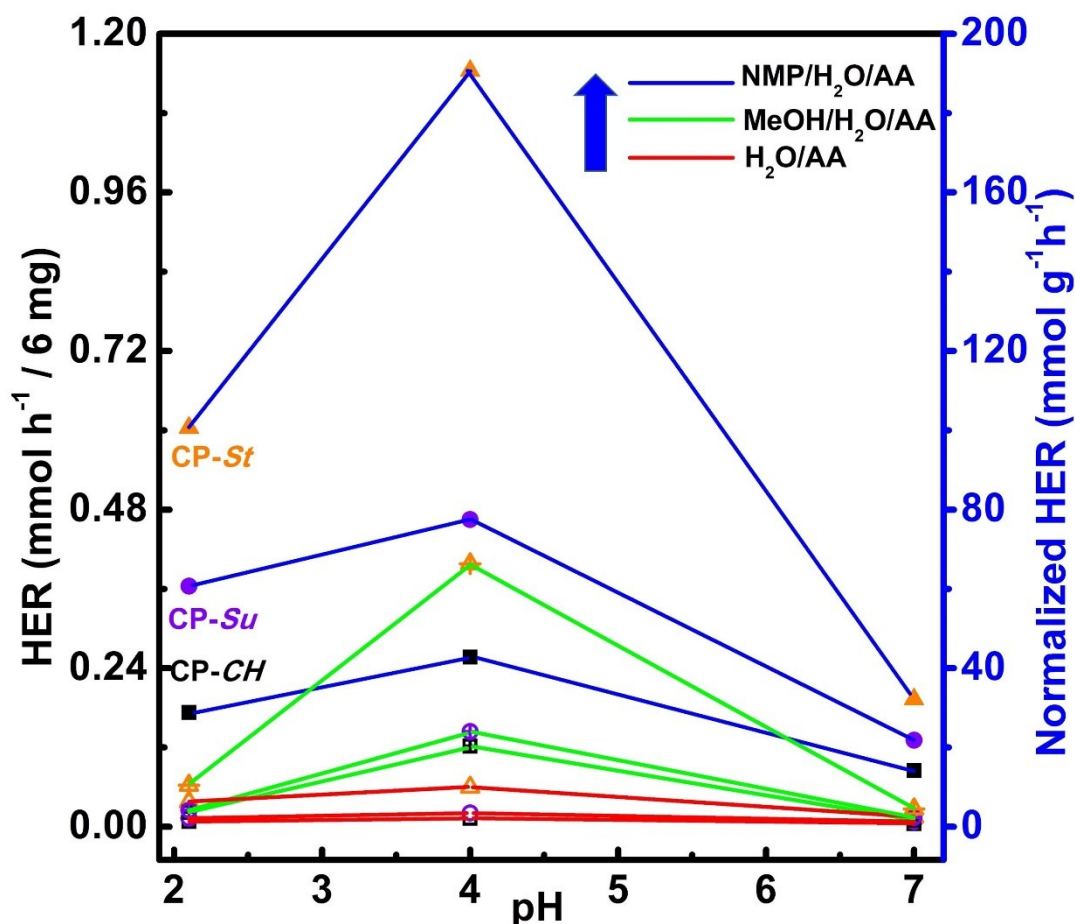

**Fig. S20** The HERs of **CP-CH**, **CP-Su** and **CP-St** dispersed in  $\text{H}_2\text{O}/\text{AA}$ ,  $\text{MeOH}/\text{H}_2\text{O}/\text{AA}$  and  $\text{NMP}/\text{H}_2\text{O}/\text{AA}$  at pHs 2.1, 4.0 and 7.0, respectively.

**Table S6.** The HERs of **CP-CH**, **CP-Su** and **CP-St** dispersed in  $\text{H}_2\text{O}/\text{AA}$ ,  $\text{MeOH}/\text{H}_2\text{O}/\text{AA}$  and  $\text{NMP}/\text{H}_2\text{O}/\text{AA}$  at pHs 2.1, 4.0 and 7.0, respectively.

| CPPs         | Solvent                          | pH=2.1                             |                                                | pH=4                               |                                                | pH=7                               |                                                |
|--------------|----------------------------------|------------------------------------|------------------------------------------------|------------------------------------|------------------------------------------------|------------------------------------|------------------------------------------------|
|              |                                  | HER                                | Normalized                                     | HER                                | Normalized                                     | HER                                | Normalized                                     |
|              |                                  | (mmol h <sup>-1</sup> )<br>6 mg CP | HER<br>(mmol h <sup>-1</sup> g <sup>-1</sup> ) | (mmol h <sup>-1</sup> )<br>6 mg CP | HER<br>(mmol h <sup>-1</sup> g <sup>-1</sup> ) | (mmol h <sup>-1</sup> )<br>6 mg CP | HER<br>(mmol h <sup>-1</sup> g <sup>-1</sup> ) |
| <b>CP-CH</b> | $\text{H}_2\text{O}$             | 0.008                              | 1.4                                            | 0.013                              | 2.2                                            | 0.005                              | 0.9                                            |
|              | $\text{MeOH}/\text{H}_2\text{O}$ | 0.022                              | 3.7                                            | 0.122                              | 20.4                                           | 0.040                              | 6.7                                            |
|              | $\text{NMP}/\text{H}_2\text{O}$  | 0.173                              | 28.9                                           | 0.257                              | 42.9                                           | 0.085                              | 14.1                                           |
| <b>CP-Su</b> | $\text{H}_2\text{O}$             | 0.013                              | 2.2                                            | 0.021                              | 3.4                                            | 0.008                              | 1.4                                            |
|              | $\text{MeOH}/\text{H}_2\text{O}$ | 0.025                              | 4.2                                            | 0.144                              | 24.0                                           | 0.038                              | 6.3                                            |
|              | $\text{NMP}/\text{H}_2\text{O}$  | 0.364                              | 60.7                                           | 0.465                              | 77.5                                           | 0.131                              | 21.9                                           |
| <b>CP-St</b> | $\text{H}_2\text{O}$             | 0.038                              | 6.3                                            | 0.060                              | 10.0                                           | 0.015                              | 2.5                                            |
|              | $\text{MeOH}/\text{H}_2\text{O}$ | 0.063                              | 10.5                                           | 0.398                              | 66.4                                           | 0.054                              | 9.1                                            |
|              | $\text{NMP}/\text{H}_2\text{O}$  | 0.604                              | 100.7                                          | <b>1.144</b>                       | <b>190.7</b>                                   | 0.193                              | 32.1                                           |

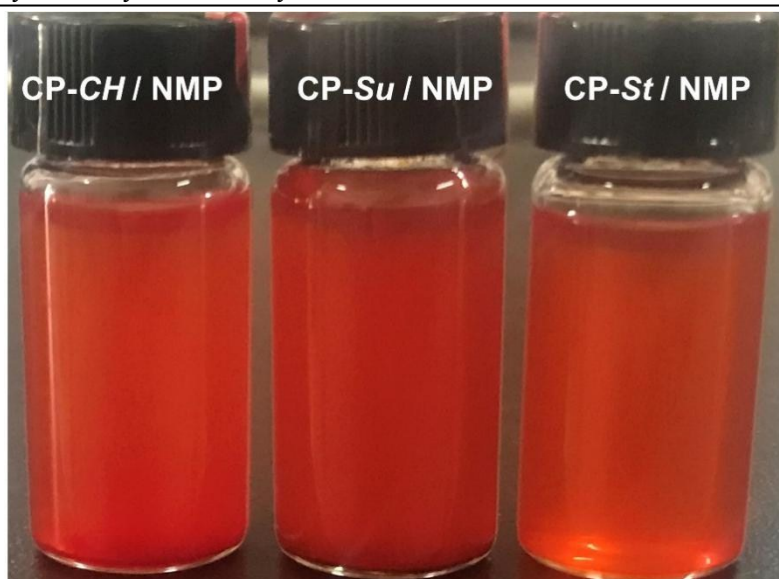

Fig. S21 CP-CH, CP-Su and CP-St ultrasonically dispersed in NMP, and stood for one week.

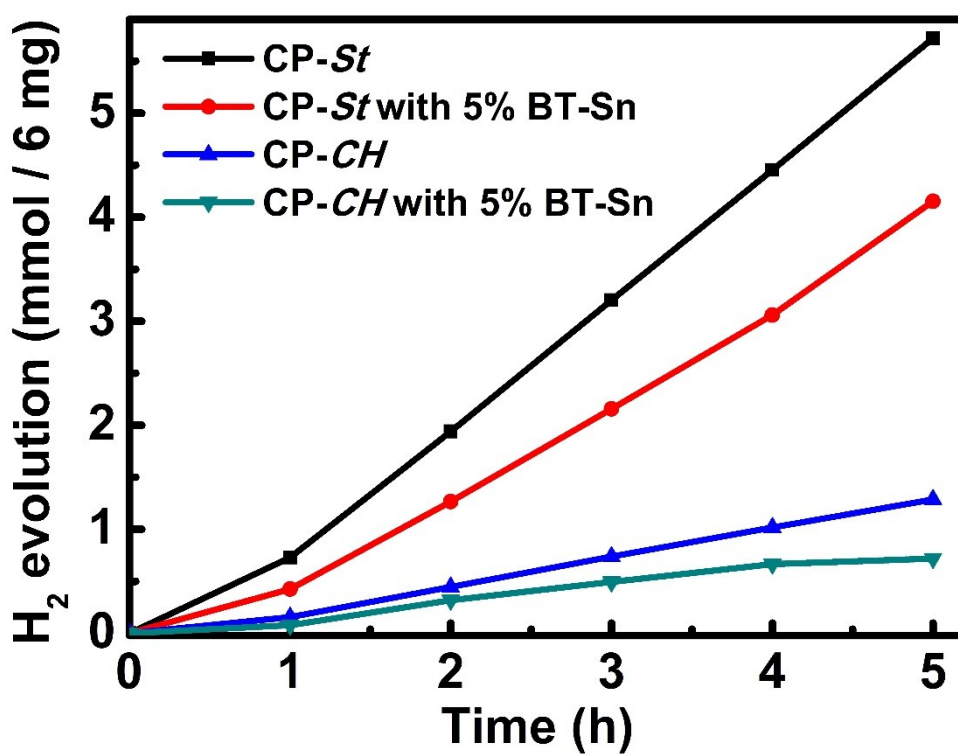

Fig. S22 HERs of CP-St and CP-CH in NMP/H<sub>2</sub>O/AA with and without BT-Sn.

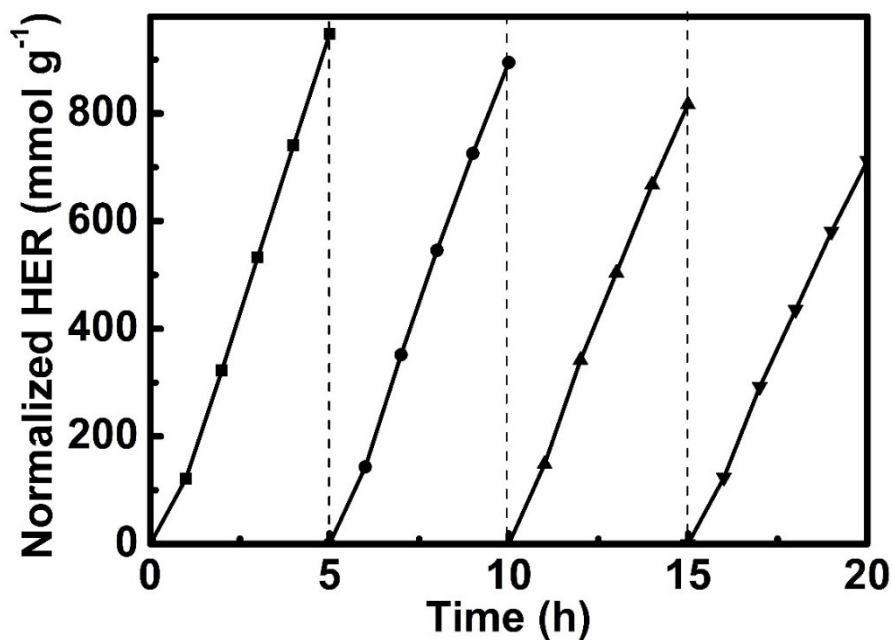

**Fig. S23** Cycling test of H<sub>2</sub> evolution (evacuation every 5 h) for **CP-*St***/NMP/H<sub>2</sub>O/AA mixture.

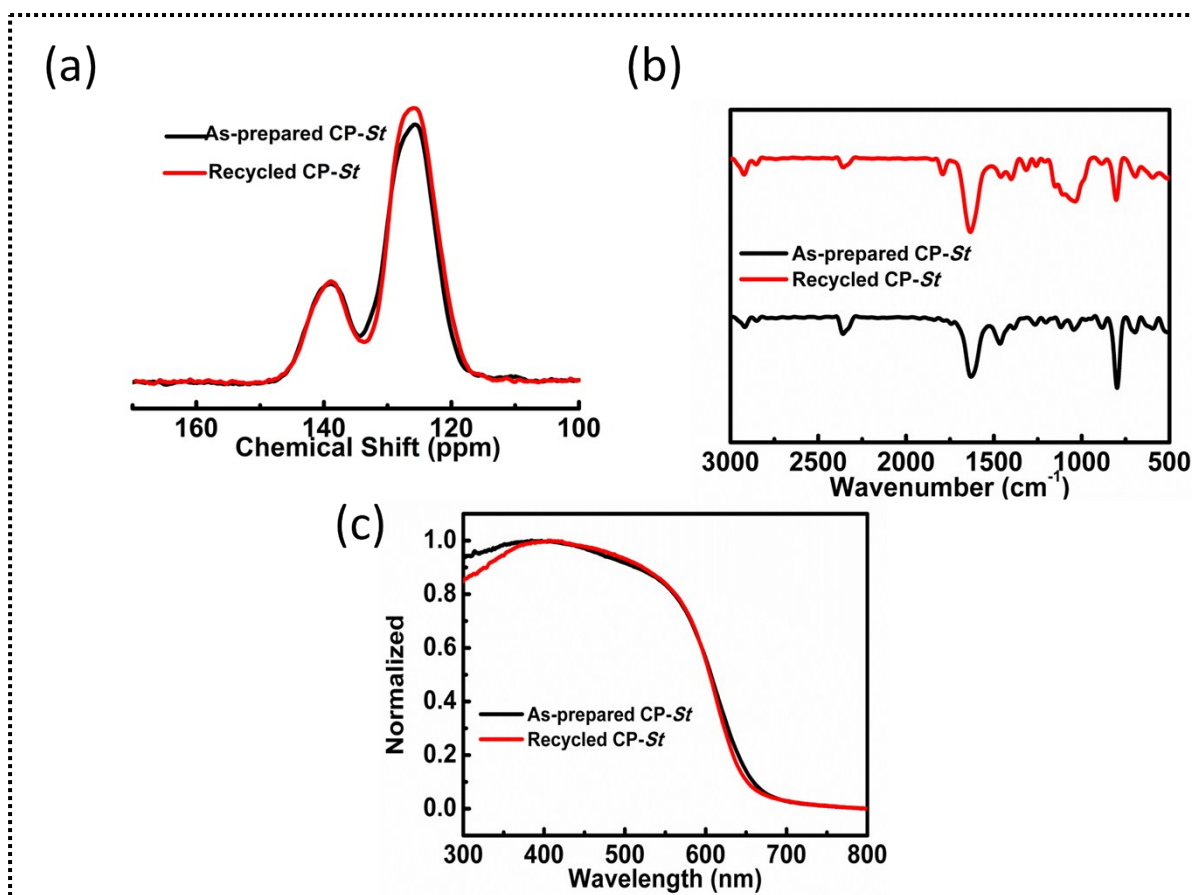

**Fig. S24** Solid-state <sup>13</sup>C NMR (a) FTIR (b) and Uv-vis (c) spectra of as-prepared and recycled **CP-*St*** from PHP reaction.

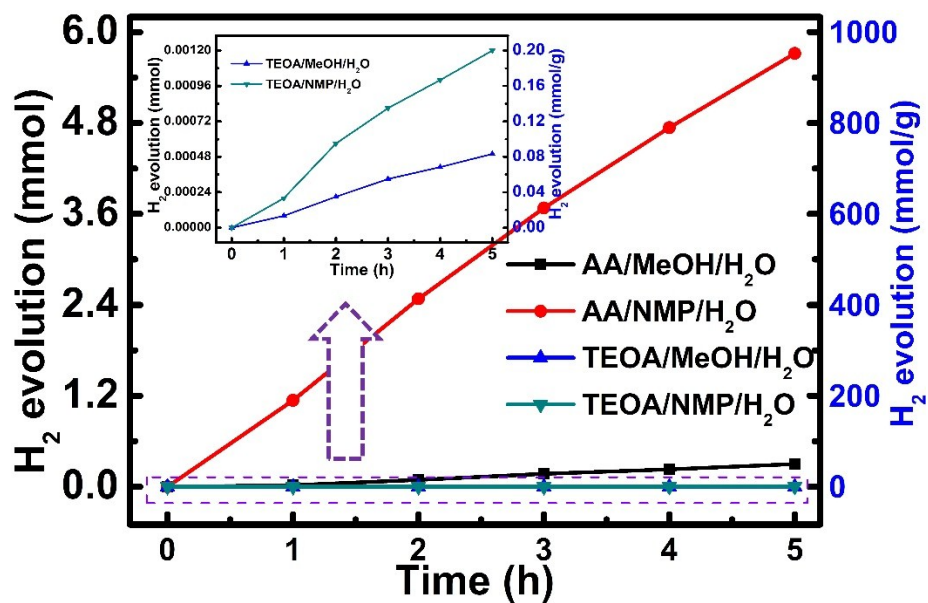

**Fig. S25** H<sub>2</sub> evolutions of 6 mg CP-St dispersed in AA/MeOH/H<sub>2</sub>O, AA/NMP/H<sub>2</sub>O, TEOA/MeOH/H<sub>2</sub>O, and TEOA/NMP/H<sub>2</sub>O under visible light irradiation.

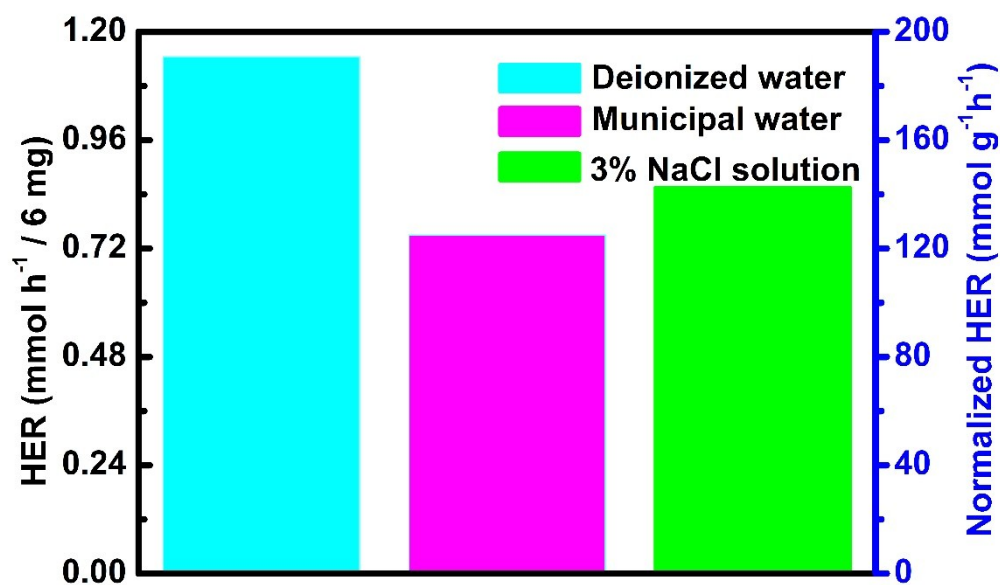

**Fig. S26** HERs of CP-St/NMP/AA dispersed in DI water, municipal water, and simulated seawater.

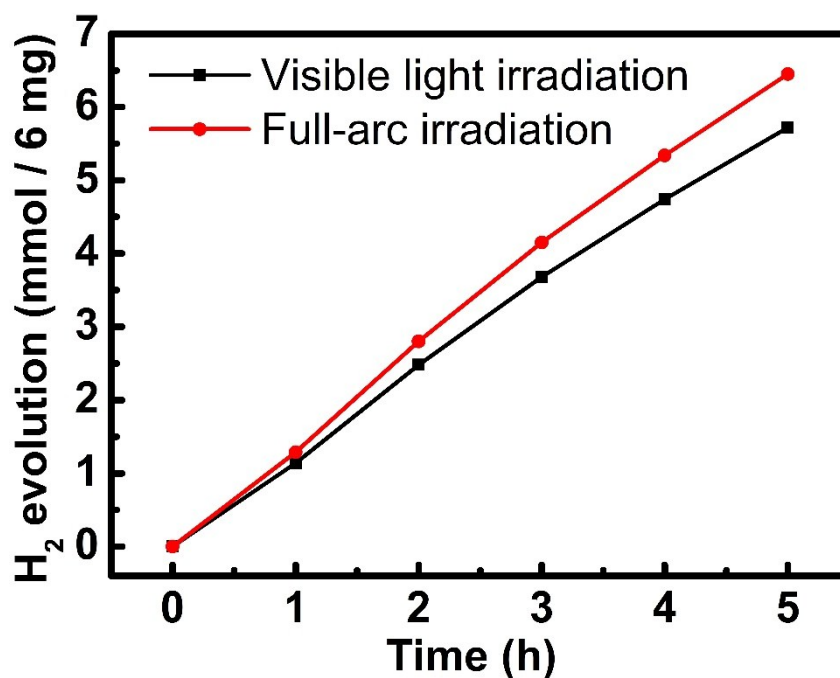

**Fig. S27**  $H_2$  evolutions of 6 mg **CP-St** dispersed in NMP/ $H_2O$ /AA dispersion under visible light irradiation and full-arc irradiation, respectively.

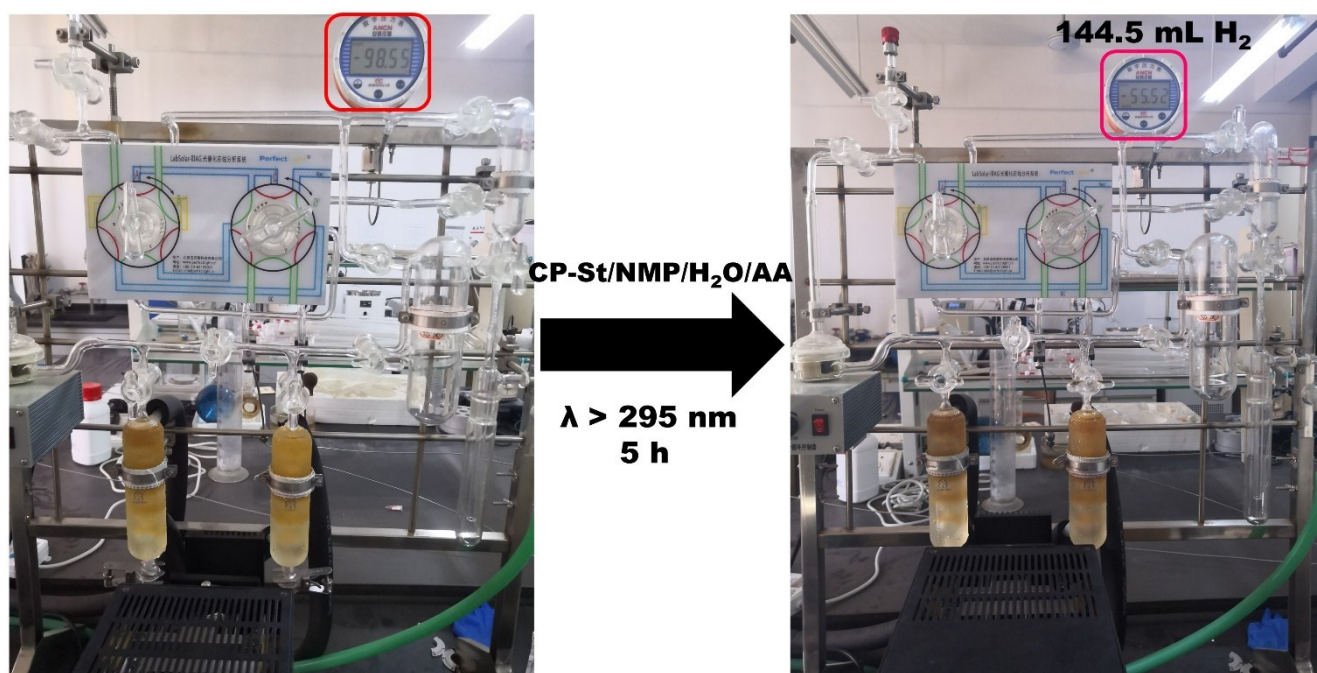

**Fig. S28** 6.0 mg **CP-St** dispersed in NMP/ $H_2O$ /AA mixed solution (36 mL, pH =4) under full-arc irradiation for 5 h. [The amount of  $H_2$  were checked by the GC equipped with a TCD detector, and the reading on vacuum gauge before and after irradiation].

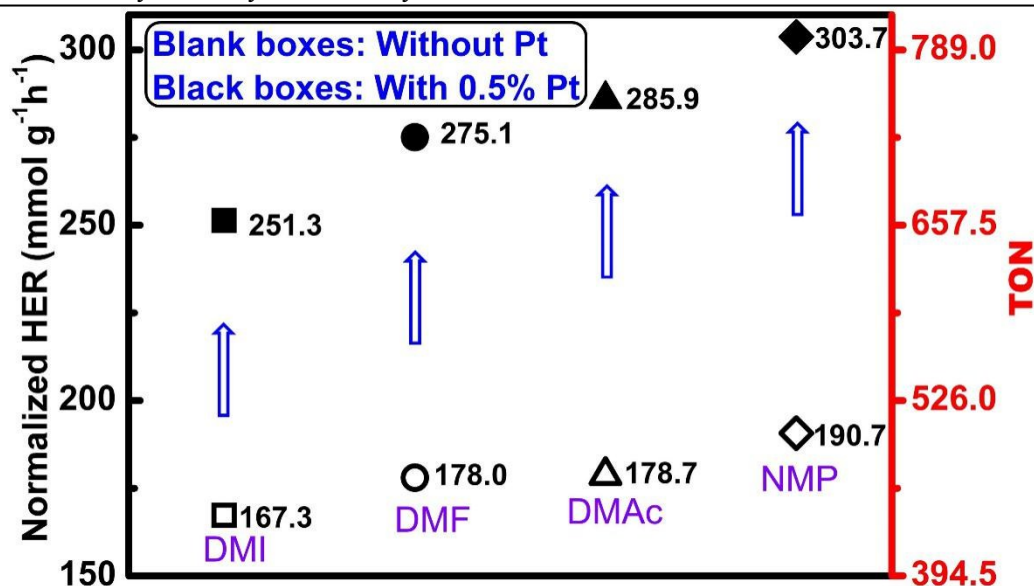

**Fig. S29** HERs and TONs of **CP-St** dispersed in cosolvents/H<sub>2</sub>O/AA, where cosolvents were DMI, NMF, DMAc and NMP respectively, with (■●▲◆) and without (□○△▽) Pt cocatalyst.

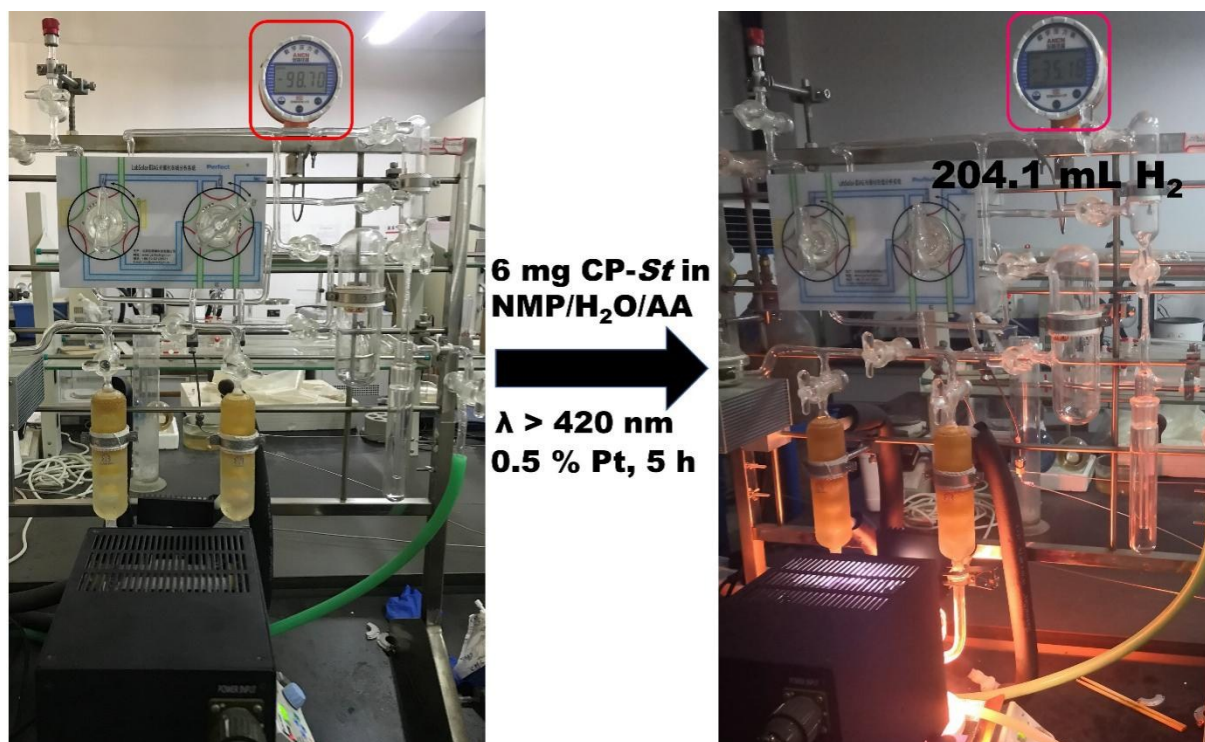

**Fig. S30** 6.0 mg **CP-St** dispersed in NMP/H<sub>2</sub>O/AA mixed solution (36 mL, pH =4) and loaded with 0.5% Pt under visible light irradiation for 5 h. [The amount of H<sub>2</sub> were checked by the GC equipped with a TCD detector, and the reading on vacuum gauge before and after irradiation].
